# Supplementary material for: Characterisation and chemometric evaluation of 17 elements in ten seaweed species from Greenland
Source: PubMed Central journal article supplement (PMC7869976; doi:10.1371/journal.pone.0243672), 2021-02-08

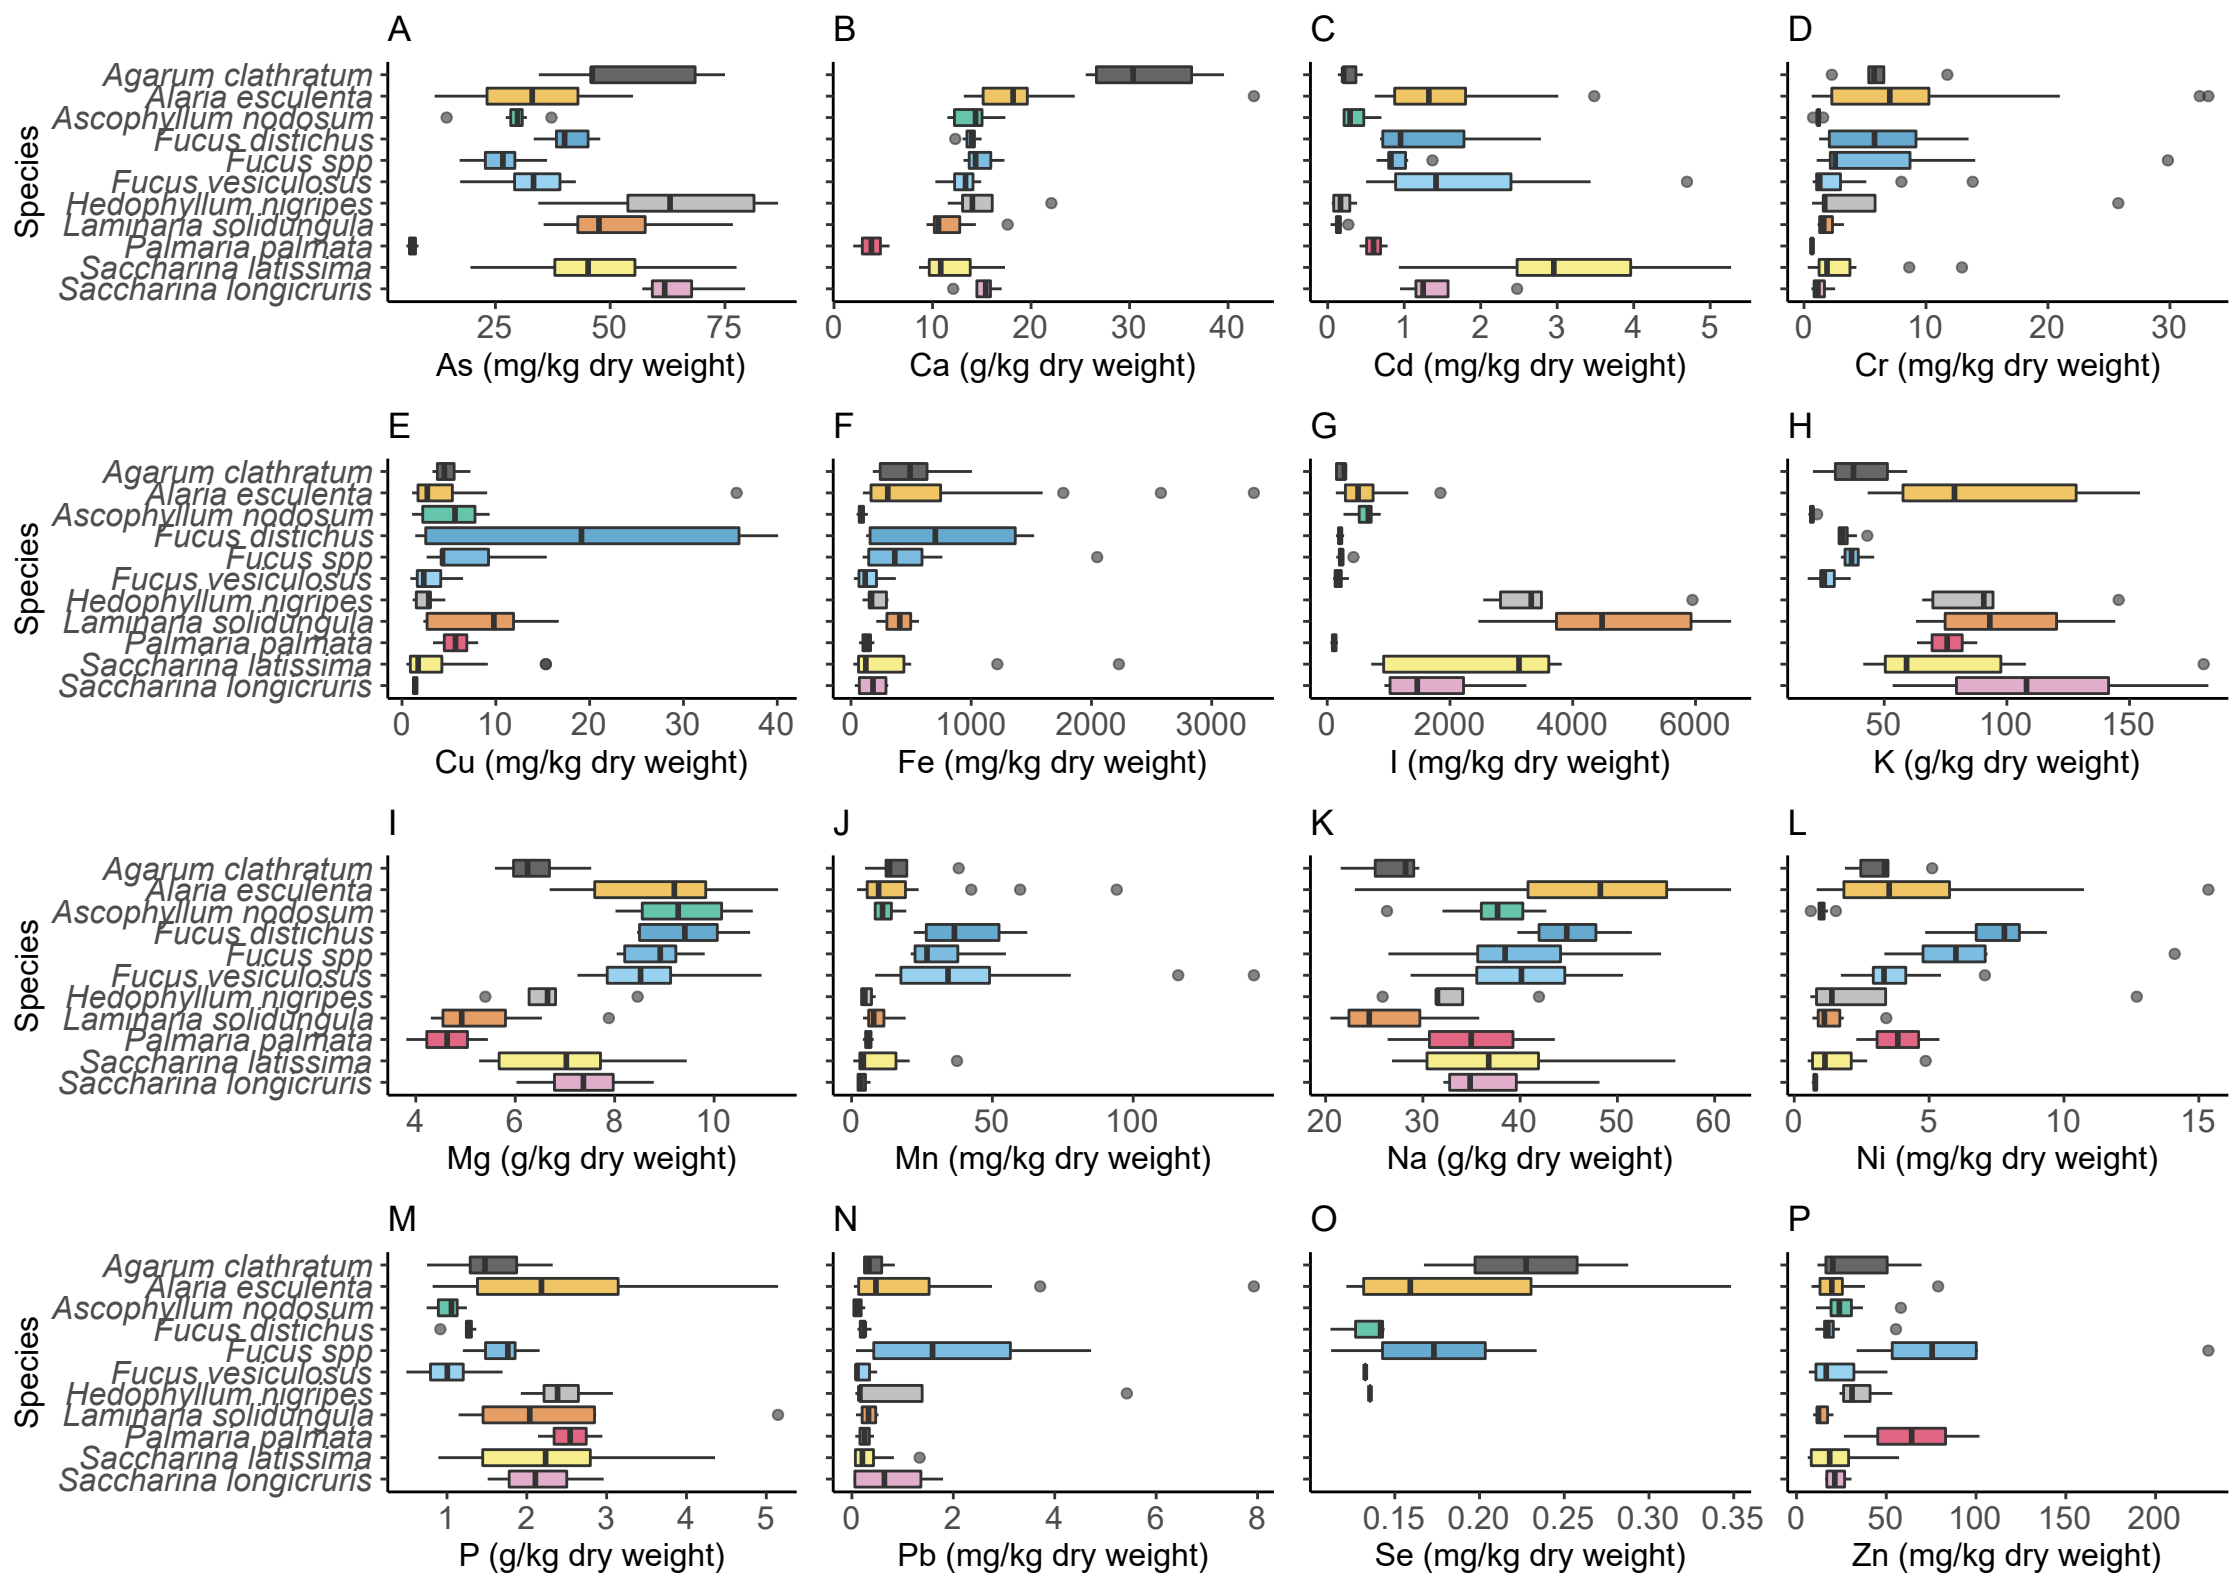

Supplement: pone.0243672.s002.pdf [file pone.0243672.s002.pdf]
